# Supplementary material for: Systems-Based Approach for Optimization of Assembly-Free Bacterial MLST Mapping
Source: MDPI journal article supplement (doi:10.3390/life12050670), 2022-04-30
Supplement: s1 [file s1]

| <b>Program</b>             | <b>Version</b> | <b>Description</b>                                                    | <b>Databases</b>                                                                        | <b>Link</b>                                                                                                     | <b>Reference</b> |
|----------------------------|----------------|-----------------------------------------------------------------------|-----------------------------------------------------------------------------------------|-----------------------------------------------------------------------------------------------------------------|------------------|
| <b>parallel-fastq-dump</b> | 0.6            | Parallel wrapper for SRA Toolkit                                      | No                                                                                      | <a href="https://github.com/rvalieris/parallel-fastq-dump">https://github.com/rvalieris/parallel-fastq-dump</a> | [58]             |
| <b>Trimmomatic</b>         | 0.38           | Trimming tool for Illumina NGS reads                                  | No                                                                                      | <a href="https://github.com/timflutre/trimmomatic">https://github.com/timflutre/trimmomatic</a>                 | [50]             |
| <b>FastQC</b>              | 0.11           | Tool to quality control for sequencing data                           | No                                                                                      | <a href="https://github.com/s-andrews/FastQC">https://github.com/s-andrews/FastQC</a>                           | [51]             |
| <b>SPAdes</b>              | 3.13           | Genome assembler                                                      | No                                                                                      | <a href="https://github.com/ablab/spades">https://github.com/ablab/spades</a>                                   | [52]             |
| <b>QUAST</b>               | 5.0            | Evaluation tool for genome assembly                                   | No                                                                                      | <a href="https://github.com/ablab/quast">https://github.com/ablab/quast</a>                                     | [53]             |
| <b>MLST</b>                | 2.16.2         | Tool for multilocus-sequence typing                                   | Integrated set of PubMLST databases for multiple organisms that can also be customized. | <a href="https://github.com/tseemann/mlst">https://github.com/tseemann/mlst</a>                                 | [22]             |
| <b>stringMLST</b>          | 0.6.3          | Tool from multilocus-sequence typing of raw genome sequencing reads   | Integrated set of PubMLST databases for multiple organisms that can also be customized. | <a href="https://github.com/jordanlab/stringMLST">https://github.com/jordanlab/stringMLST</a>                   | [17]             |
| <b>AMOS</b>                | 3.1            | Collection of tools for genome assembly and related statistics        | No                                                                                      | <a href="http://amos.sourceforge.net/wiki/index.php/AMOS">http://amos.sourceforge.net/wiki/index.php/AMOS</a>   | [54]             |
| <b>EMBOSS</b>              | 6.6            | European Molecular Biology Open Software Suite that contains multiple | No                                                                                      | <a href="http://emboss.open-bio.org/">http://emboss.open-bio.org/</a>                                           | [55]             |

|                 |        |                                                |    |                                                                                     |      |
|-----------------|--------|------------------------------------------------|----|-------------------------------------------------------------------------------------|------|
|                 |        | bioinformatics functionalities                 |    |                                                                                     |      |
| <b>DSK</b>      | 2.2.0  | Tool for counting k-mers from reads or genomes | No | <a href="https://github.com/GATB/dsk/">https://github.com/GATB/dsk/</a>             | [56] |
| <b>GNU Bash</b> | 4.4.20 | Unix shell and command tool                    | No | <a href="https://www.gnu.org/software/bash/">https://www.gnu.org/software/bash/</a> |      |

**Table S2.** Description of bioinformatics programs used including their versions, available databases, links and references.
