# Supplementary material for: Systems-Based Approach for Optimization of Assembly-Free Bacterial MLST Mapping
Source: MDPI journal article supplement (doi:10.3390/life12050670), 2022-04-30
Supplement: s1 [file s1]

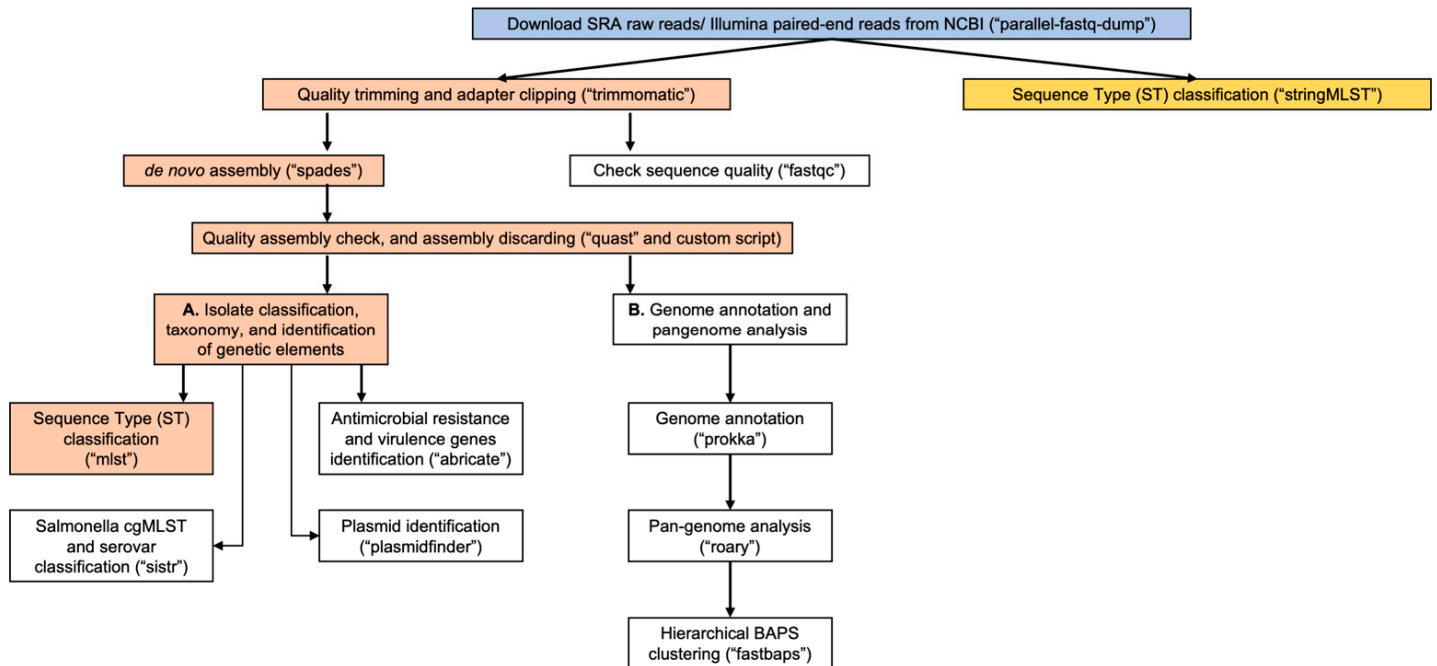

**Figure S17.** ProkEvo’s computational workflow with both mlst and stringMLST included for ST-based classification.

Top-down flow of tasks for the ProkEvo computational pipeline. The squares represent the steps, while the bioinformatics tool used for each step is shown in brackets. The sub-workflow on the left includes all the steps of the current ProkEvo platform, for which the steps needed for obtaining ST classifications with mlst are colored in orange. The sub-workflow on the right includes all the steps of the alternative path in the ProkEvo platform, where stringMLST was integrated for ST-based classification.
