# Supplementary material for: Systems-Based Approach for Optimization of Assembly-Free Bacterial MLST Mapping
Source: MDPI journal article supplement (doi:10.3390/life12050670), 2022-04-30
Supplement: s1 [file s1]

**A.**

PERMANOVA model using the proportion of non-classified STs as **dependent variable** and the following **independent variables**:  
bacterial species (species) and program as MLST or stringMLST (program)

Model = adonis(formula = prop ~ species \* program, data = d18, permutations = 1000)

|                 | Df  | SumsOfSqs        | MeanSqs            | F.Model          | R <sup>2</sup>     | Pr(>F)               |
|-----------------|-----|------------------|--------------------|------------------|--------------------|----------------------|
| species         | 3   | 3.34480401068386 | 1.11493467022795   | 23.3264912660022 | 0.324922836900245  | 0.000999000999000999 |
| program         | 9   | 0.681352798076   | 0.075705866452889  | 1.58390646533342 | 0.0661883576357917 | 0.0719280719280719   |
| species:program | 27  | 2.44423752682071 | 0.0905273158081743 | 1.89399854352207 | 0.237439499813996  | 0.002997002997003    |
| Residuals       | 80  | 3.82375440014142 | 0.0477969300017678 |                  | 0.371449305649967  |                      |
| Total           | 119 | 10.294148735722  |                    |                  | 1                  |                      |

**B.**

PERMANOVA model using the proportion of non-classified STs as **dependent variable** and the following **independent variable**:  
bacterial species (species)

Model = adonis(formula = prop ~ species, data = d18, permutations = 1000)

|           | Df  | SumsOfSqs        | MeanSqs            | F.Model         | R <sup>2</sup>    | Pr(>F)               |
|-----------|-----|------------------|--------------------|-----------------|-------------------|----------------------|
| species   | 3   | 3.34480401068386 | 1.11493467022795   | 18.610736244018 | 0.324922836900245 | 0.000999000999000999 |
| Residuals | 116 | 6.94934472503813 | 0.0599081441813632 |                 | 0.675077163099755 |                      |
| Total     | 119 | 10.294148735722  |                    |                 | 1                 |                      |

**C.**

PERMANOVA model using the proportion of non-classified STs as **dependent variable** and the following **independent variable**:  
program as MLST or stringMLST (program)

Model = adonis(formula = prop ~ program, data = d18, permutations = 1000)

|           | Df  | SumsOfSqs        | MeanSqs            | F.Model           | R <sup>2</sup>     | Pr(>F)            |
|-----------|-----|------------------|--------------------|-------------------|--------------------|-------------------|
| program   | 9   | 0.681352798076   | 0.0757058664528889 | 0.866308341905474 | 0.0661883576357917 | 0.631368631368631 |
| Residuals | 110 | 9.61279593764599 | 0.0873890539785999 |                   | 0.933811642364208  |                   |
| Total     | 119 | 10.294148735722  |                    |                   | 1                  |                   |

**D.**

PERMANOVA model using the proportion of non-classified STs as **dependent variable** and the following **independent variable**:  
median of the number of contigs (num\_contigs\_median)

Model = adonis(formula = prop ~ num\_contigs\_median, data = d18, permutations = 1000)

|                    | Df  | SumsOfSqs        | MeanSqs            | F.Model          | R <sup>2</sup>    | Pr(>F)               |
|--------------------|-----|------------------|--------------------|------------------|-------------------|----------------------|
| num_contigs_median | 1   | 2.78200760329276 | 2.78200760329276   | 43.6995114177773 | 0.270251351006698 | 0.000999000999000999 |
| Residuals          | 118 | 7.51214113242923 | 0.0636622129866884 |                  | 0.729748648993302 |                      |
| Total              | 119 | 10.294148735722  |                    |                  | 1                 |                      |

**E.**

PERMANOVA model using the proportion of non-classified STs as **dependent variable** and the following **independent variable**:  
mean of the total counts for nucleotides per genomes (total\_nucl\_mean)

Model = adonis(formula = prop ~ total\_nucl\_mean, data = d18, permutations = 1000)

|                 | Df  | SumsOfSqs         | MeanSqs            | F.Model          | R <sup>2</sup>     | Pr(>F)            |
|-----------------|-----|-------------------|--------------------|------------------|--------------------|-------------------|
| total_nucl_mean | 1   | 0.312873903121628 | 0.312873903121628  | 3.69883819327053 | 0.0303933730854224 | 0.035964035964036 |
| Residuals       | 118 | 9.98127483260036  | 0.0845870748525455 |                  | 0.969606626914578  |                   |
| Total           | 119 | 10.294148735722   |                    |                  | 1                  |                   |

**F.**

PERMANOVA model using the proportion of non-classified STs as **dependent variable** and the following **independent variable**:  
mean of the average GC% per genome (gc\_avg\_mean)

Model = adonis(formula = prop ~ gc\_avg\_mean, data = d18, permutations = 1000)

|             | Df  | SumsOfSqs         | MeanSqs            | F.Model         | R <sup>2</sup>    | Pr(>F)             |
|-------------|-----|-------------------|--------------------|-----------------|-------------------|--------------------|
| gc_avg_mean | 1   | 0.235317166826526 | 0.235317166826526  | 2.7605021015954 | 0.022859312884216 | 0.0659340659340659 |
| Residuals   | 118 | 10.0588315688955  | 0.0852443353296226 |                 | 0.977140687115784 |                    |
| Total       | 119 | 10.294148735722   |                    |                 | 1                 |                    |

**G.**

PERMANOVA model using the proportion of non-classified STs as **dependent variable** and the following **independent variable**:  
mean of the total counts of unique STs per program (st\_count\_mean)

Model = adonis(formula = prop ~ st\_count\_mean, data = d18, permutations = 1000)

|               | Df  | SumsOfSqs          | MeanSqs            | F.Model           | R <sup>2</sup>      | Pr(>F)            |
|---------------|-----|--------------------|--------------------|-------------------|---------------------|-------------------|
| st_count_mean | 1   | 0.0631382909852366 | 0.0631382909852366 | 0.728209435079862 | 0.00613341545825336 | 0.472527472527473 |
| Residuals     | 118 | 10.2310104447368   | 0.0867034783452267 |                   | 0.993866584541747   |                   |
| Total         | 119 | 10.294148735722    |                    |                   | 1                   |                   |

**H.**

PERMANOVA model using the proportion of non-classified STs as **dependent variable** and the following **independent variable**:  
mean of the total counts of unique alleles across all genes per program (total\_alleles\_genes\_mean)

Model = adonis(formula = prop ~ total\_alleles\_genes\_mean, data = d18, permutations = 1000)

|                          | Df  | SumsOfSqs         | MeanSqs           | F.Model          | R <sup>2</sup>     | Pr(>F)            |
|--------------------------|-----|-------------------|-------------------|------------------|--------------------|-------------------|
| total_alleles_genes_mean | 1   | 0.835211515433743 | 0.835211515433743 | 10.4192423023798 | 0.0811345878980215 | 0.001998001998002 |
| Residuals                | 118 | 9.45893722028825  | 0.080160484917697 |                  | 0.918865412101978  |                   |
| Total                    | 119 | 10.294148735722   |                   |                  | 1                  |                   |

I.

PERMANOVA model using the proportion of non-classified STs as **dependent variable** and the following **independent variable**:  
Simpson's D index of diversity per species (simpson)

Model = adonis(formula = prop ~ simpson, data = d18, permutations = 1000)

|           | Df  | SumsOfSqs        | MeanSqs            | F.Model          | R <sup>2</sup>    | Pr(>F)              |
|-----------|-----|------------------|--------------------|------------------|-------------------|---------------------|
| simpson   | 1   | 2.37335228285581 | 2.37335228285581   | 35.3569961106178 | 0.230553525481906 | 0.00099900099900999 |
| Residuals | 118 | 7.92079645286619 | 0.0671253936683575 |                  | 0.769446474518094 |                     |
| Total     | 119 | 10.294148735722  |                    |                  | 1                 |                     |

J.

PPERMANOVA model using the proportion of non-classified STs as **dependent variable** and the following **independent variable**:  
Standard deviation of the number of contigs (num\_contigs\_sd)

Model = adonis(formula = prop ~ num\_contigs\_sd, data = d18b, permutations = 1000)

|                | Df  | SumsOfSqs         | MeanSqs            | F.Model          | R <sup>2</sup>     | Pr(>F)            |
|----------------|-----|-------------------|--------------------|------------------|--------------------|-------------------|
| num_contigs_sd | 1   | 0.343617214899233 | 0.343617214899233  | 4.07484075330651 | 0.0333798572102265 | 0.022977022977023 |
| Residuals      | 118 | 9.95053152082276  | 0.0843265383120573 |                  | 0.966620142789774  |                   |
| Total          | 119 | 10.294148735722   |                    |                  | 1                  |                   |

**K.**

PERMANOVA model using the proportion of non-classified STs as **dependent variable** and the following **independent variable**:  
Standard deviation of the total counts for nucleotides per genomes (total\_nucl\_sd)

Model = adonis(formula = prop ~ total\_nucl\_sd, data = d18b, permutations = 1000)

|               | Df  | SumsOfSqs        | MeanSqs            | F.Model          | R <sup>2</sup>    | Pr(>F)               |
|---------------|-----|------------------|--------------------|------------------|-------------------|----------------------|
| total_nucl_sd | 1   | 2.51052137919844 | 2.51052137919844   | 38.0595716079769 | 0.243878483170407 | 0.000999000999000999 |
| Residuals     | 118 | 7.78362735652355 | 0.0659629436993521 |                  | 0.756121516829593 |                      |
| Total         | 119 | 10.294148735722  |                    |                  | 1                 |                      |

**L.**

PERMANOVA model using the proportion of non-classified STs as **dependent variable** and the following **independent variable**:  
Standard deviation of the average GC% per genome (gc\_avg\_sd)

Model = adonis(formula = prop ~ gc\_avg\_sd, data = d18b, permutations = 1000)

|           | Df  | SumsOfSqs        | MeanSqs            | F.Model          | R <sup>2</sup>     | Pr(>F)            |
|-----------|-----|------------------|--------------------|------------------|--------------------|-------------------|
| gc_avg_sd | 1   | 0.67622148287334 | 0.67622148287334   | 8.29639618613466 | 0.0656898885215022 | 0.002997002997003 |
| Residuals | 118 | 9.61792725284865 | 0.0815078580749886 |                  | 0.934310111478498  |                   |
| Total     | 119 | 10.294148735722  |                    |                  | 1                  |                   |

**Figure S9.** PERMANOVA results measuring the association between species, program, or other genome-intrinsic and –extrinsic variables and the proportion of non-classified STs.

PERMANOVA results demonstrating the association (*R*-squared and *p*-values) between non-classified STs (prop) and: (A) bacterial species and program (mlst vs.

stringMLST with all k-mer lengths); (B) bacterial species; (C) program (mlst vs. stringMLST with all k-mer lengths); (D) the median number of contigs (num\_contigs\_median); (E) the mean total number of nucleotides (total\_nucl\_mean); (F) the mean GC% content originally calculated per genome (gc\_avg\_mean); (G) the mean total count of STs present in each generated database (st\_count\_mean); (H) the mean total count of unique alleles (across all 7 loci) present in each generated database (total\_alleles\_genes\_mean); (I) the Simpson's D index of diversity (simpson); (J) the standard deviation (SD) of the number of contigs (num\_contigs\_sd); (K) the SD of the total number of nucleotides (total\_nucl\_sd); (L) the SD of the GC% content per genome (gc\_avg\_sd). The median number of contigs, mean total number of nucleotides, and mean GC% content were grouped by species and batch (experimental replicate). The SD of the number of contigs, SD of the total number of nucleotides, and SD of GC% content were calculated by species only. The mean total count of STs and mean total count of unique alleles (across all 7 loci) present in each generated database were calculated after grouping by species, batch (three experimental replicates), and program. The Simpson's D index of diversity was calculated after grouping by program, species, and batch (three experimental replicates). All PERMANOVA models were run with 1,000 permutations.
