# Supplementary material for: Systems-Based Approach for Optimization of Assembly-Free Bacterial MLST Mapping
Source: MDPI journal article supplement (doi:10.3390/life12050670), 2022-04-30
Supplement: s1 [file s1]

| Organism                          | Number of raw Illumina reads | Number of Illumina reads after filtering | Number of reads after MLST |
|-----------------------------------|------------------------------|------------------------------------------|----------------------------|
| <i>Salmonella</i> Agona           | 100                          | 100                                      | 100                        |
| <i>Salmonella</i> Anatum          | 100                          | 100                                      | 100                        |
| <i>Salmonella</i> Braenderup      | 100                          | 100                                      | 100                        |
| <i>Salmonella</i> Derby           | 100                          | 100                                      | 100                        |
| <i>Salmonella</i> Dublin          | 100                          | 100                                      | 100                        |
| <i>Salmonella</i> Enteritidis     | 100                          | 99                                       | 99                         |
| <i>Salmonella</i> Hadar           | 100                          | 100                                      | 100                        |
| <i>Salmonella</i> Heidelberg      | 100                          | 100                                      | 100                        |
| <i>Salmonella</i> Infantis        | 100                          | 100                                      | 100                        |
| <i>Salmonella</i> Javiana         | 100                          | 100                                      | 100                        |
| <i>Salmonella</i> Johannesburg    | 100                          | 100                                      | 100                        |
| <i>Salmonella</i> Kentucky        | 100                          | 100                                      | 100                        |
| <i>Salmonella</i> Mbandaka        | 100                          | 100                                      | 100                        |
| <i>Salmonella</i> Montevideo      | 100                          | 100                                      | 100                        |
| <i>Salmonella</i> Muenchen        | 100                          | 96                                       | 96                         |
| <i>Salmonella</i> Newport         | 100                          | 98                                       | 98                         |
| <i>Salmonella</i> Schwarzengrund  | 100                          | 100                                      | 100                        |
| <i>Salmonella</i> Senftenberg     | 100                          | 100                                      | 100                        |
| <i>Salmonella</i> Thompson        | 100                          | 100                                      | 100                        |
| <i>Salmonella</i> Typhimurium     | 100                          | 100                                      | 100                        |
| <i>Acinetobacter baumannii</i>    | 1000                         | 901                                      | 343                        |
| <i>Campylobacter jejuni</i>       | 1000                         | 996                                      | 995                        |
| <i>Clostridium difficile</i>      | 1000                         | 839                                      | 833                        |
| <i>Enterococcus faecium</i>       | 1000                         | 915                                      | 913                        |
| <i>Escherichia coli</i>           | 1000                         | 895                                      | 895                        |
| <i>Haemophilus influenzae</i>     | 1000                         | 951                                      | 949                        |
| <i>Helicobacter pylori</i>        | 1000                         | 874                                      | 874                        |
| <i>Klebsiella pneumoniae</i>      | 1000                         | 920                                      | 918                        |
| <i>Listeria monocytogenes</i>     | 1000                         | 998                                      | 996                        |
| <i>Mycobacterium tuberculosis</i> | 1000                         | 809                                      | 790                        |
| <i>Neisseria gonorrhoeae</i>      | 1000                         | 915                                      | 915                        |
| <i>Pseudomonas aeruginosa</i>     | 1000                         | 956                                      | 954                        |
| <i>Staphylococcus aureus</i>      | 1000                         | 998                                      | 998                        |
| <i>Streptococcus pneumoniae</i>   | 1000                         | 940                                      | 940                        |
| <i>Enterococcus faecalis</i>      | 100                          | 92                                       | 92                         |
| <i>Enterococcus faecium</i>       | 100                          | 92                                       | 92                         |
| <i>Helicobacter pylori</i>        | 100                          | 81                                       | 81                         |

**Table S4.** Number of reads used for calculating percentage of agreement between mlst and stringMLST for 23 *Salmonella enterica* serovars and 14 phylogenetic divergent bacterial pathogens.

The datasets used to calculate percentage of agreement contained 100 or 1,000 paired-end raw Illumina reads downloaded from NCBI-SRA (first column in the Table). Before running mlst, a few steps were required, such as quality trimming and adapter clipping, *de novo* assembly and assembly filtering. After the filtering steps were completed, a fraction of all genomes were discarded from the mlst analyses. This number is shown in the second column in the Table. Additionally, mlst infrequently adds empty columns in its results, and these records were removed before conducting the final statistical analyses to calculate the percentage of agreement between programs (third column in the Table). All downloaded genomes were freely available at NCBI-SRA.
