# Supplementary material for: Systems-Based Approach for Optimization of Assembly-Free Bacterial MLST Mapping
Source: MDPI journal article supplement (doi:10.3390/life12050670), 2022-04-30
Supplement: s1 [file s1]

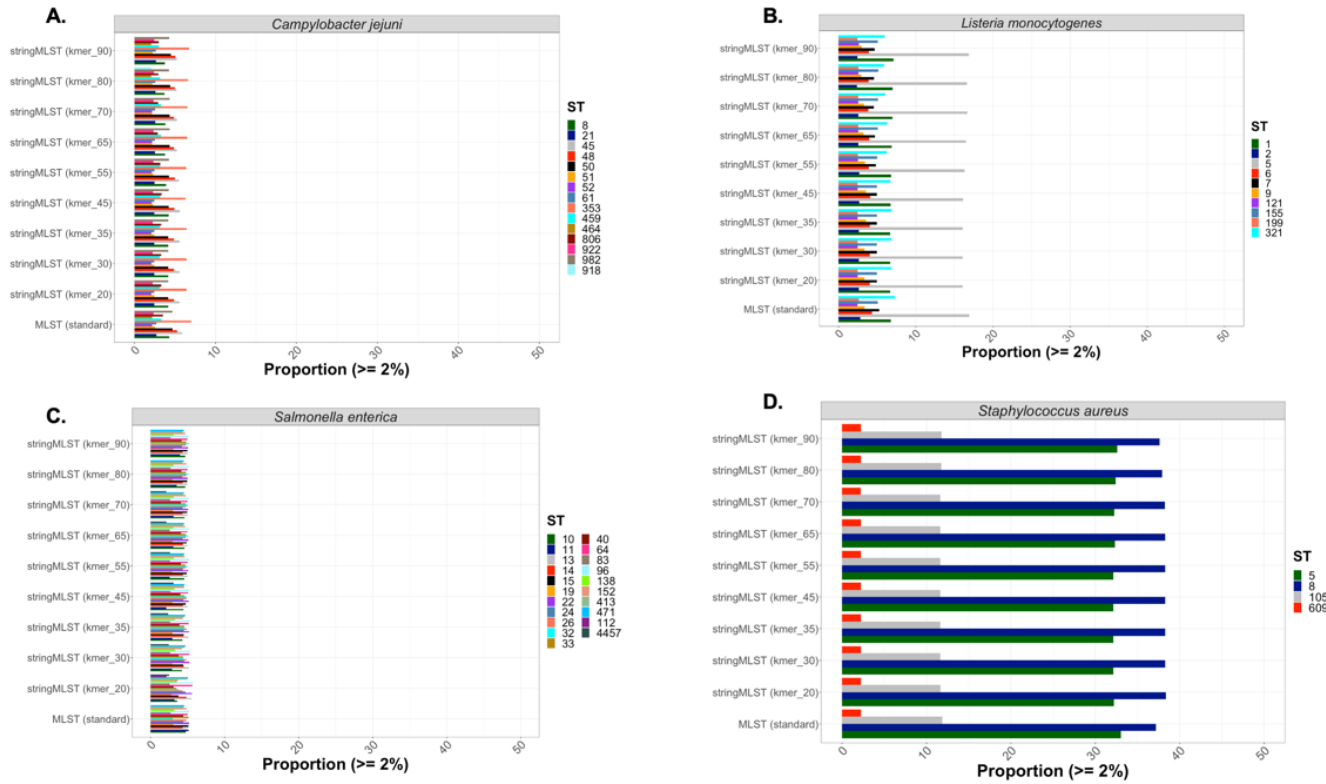

**Figure S4.** Relative frequency of dominant STs across programs and bacterial species. Plots A-D depict the proportion of STs across all four bacterial species including *C. jejuni*, *L. monocytogenes*, *S. enterica* (all twenty serovars), and *S. aureus*, respectively. Only STs with a proportion equal or above 2% were shown across all plots.
