# Supplementary material for: Systems-Based Approach for Optimization of Assembly-Free Bacterial MLST Mapping
Source: MDPI journal article supplement (doi:10.3390/life12050670), 2022-04-30
Supplement: s1 [file s1]

**A.**

PERMANOVA model using the proportion of non-classified STs as **dependent variable** and the following **independent variables**:  
*S. enterica* serovars (serovar) and program as MLST or stringMLST (program)

Model = adonis(formula = prop ~ serovar \* program, data = d18b, permutations = 1000)

|                 | Df  | SumsOfSqs        | MeanSqs           | F.Model          | R <sup>2</sup>    | Pr(>F)               |
|-----------------|-----|------------------|-------------------|------------------|-------------------|----------------------|
| serovar         | 19  | 26.8401628518863 | 1.41264015009928  | 37.1490819014527 | 0.353830505059659 | 0.000999000999000999 |
| program         | 9   | 16.0133235978993 | 1.77925817754437  | 46.7902655582739 | 0.211101639270802 | 0.000999000999000999 |
| serovar:program | 163 | 20.8721297433185 | 0.12804987572588  | 3.36740770144276 | 0.275154672104759 | 0.000999000999000999 |
| Residuals       | 319 | 12.1303726718492 | 0.038026246620217 |                  | 0.15991318356478  |                      |
| Total           | 510 | 75.8559888649533 |                   |                  | 1                 |                      |

**B.**

PERMANOVA model using the proportion of non-classified STs as **dependent variable** and the following **independent variable**:  
*S. enterica* serovars (serovar)

Model = adonis(formula = prop ~ serovar, data = d18b, permutations = 1000)

|           | Df  | SumsOfSqs        | MeanSqs            | F.Model          | R <sup>2</sup>    | Pr(>F)               |
|-----------|-----|------------------|--------------------|------------------|-------------------|----------------------|
| serovar   | 19  | 26.8401628518863 | 1.41264015009928   | 14.1506605134807 | 0.353830505059659 | 0.000999000999000999 |
| Residuals | 491 | 49.015826013067  | 0.0998285662180591 |                  | 0.646169494940341 |                      |
| Total     | 510 | 75.8559888649533 |                    |                  | 1                 |                      |

C.

PERMANOVA model using the proportion of non-classified STs as **dependent variable** and the following **independent variable**:  
program as MLST or stringMLST (program)

Model = adonis(formula = prop ~ program, data = d18b, permutations = 1000)

|           | Df  | SumsOfSqs        | MeanSqs           | F.Model          | R <sup>2</sup>    | Pr(>F)               |
|-----------|-----|------------------|-------------------|------------------|-------------------|----------------------|
| program   | 9   | 15.6969648506825 | 1.74410720563139  | 14.5247986372593 | 0.206931121531194 | 0.000999000999000999 |
| Residuals | 501 | 60.1590240142707 | 0.120077892244053 |                  | 0.793068878468806 |                      |
| Total     | 510 | 75.8559888649532 |                   |                  | 1                 |                      |

D.

PERMANOVA model using the proportion of non-classified STs as **dependent variable** and the following **independent variable**:  
median of the number of contigs (num\_contigs\_median)

Model = adonis(formula = prop ~ num\_contigs\_median, data = d18b, permutations = 1000)

|                    | Df  | SumsOfSqs         | MeanSqs           | F.Model          | R <sup>2</sup>      | Pr(>F)             |
|--------------------|-----|-------------------|-------------------|------------------|---------------------|--------------------|
| num_contigs_median | 1   | 0.391781222321214 | 0.391781222321214 | 2.64253277667546 | 0.00516480278200188 | 0.0609390609390609 |
| Residuals          | 509 | 75.4642076426321  | 0.148259739965878 |                  | 0.994835197217998   |                    |
| Total              | 510 | 75.8559888649533  |                   |                  | 1                   |                    |

**E.**

PERMANOVA model using the proportion of non-classified STs as **dependent variable** and the following **independent variable**:  
mean of the total counts for nucleotides per genomes (total\_nucl\_mean)

Model = adonis(formula = prop ~ total\_nucl\_mean, data = d18b, permutations = 1000)

|                 | Df  | SumsOfSqs        | MeanSqs           | F.Model          | R <sup>2</sup>     | Pr(>F)               |
|-----------------|-----|------------------|-------------------|------------------|--------------------|----------------------|
| total_nucl_mean | 1   | 4.48323273411096 | 4.48323273411096  | 31.9725002279458 | 0.0591018955944596 | 0.000999000999000999 |
| Residuals       | 509 | 71.3727561308423 | 0.140221524815014 |                  | 0.94089810440554   |                      |
| Total           | 510 | 75.8559888649533 |                   |                  | 1                  |                      |

**F.**

PERMANOVA model using the proportion of non-classified STs as **dependent variable** and the following **independent variable**:  
mean of the average GC% per genome (gc\_avg\_mean)

Model = adonis(formula = prop ~ gc\_avg\_mean, data = d18b, permutations = 1000)

|             | Df  | SumsOfSqs         | MeanSqs           | F.Model          | R <sup>2</sup>      | Pr(>F)            |
|-------------|-----|-------------------|-------------------|------------------|---------------------|-------------------|
| gc_avg_mean | 1   | 0.291982834228857 | 0.291982834228857 | 1.96679967658226 | 0.00384917313184956 | 0.130869130869131 |
| Residuals   | 509 | 75.5640060307244  | 0.148455807525981 |                  | 0.99615082686815    |                   |
| Total       | 510 | 75.8559888649533  |                   |                  | 1                   |                   |

**G.**

PERMANOVA model using the proportion of non-classified STs as **dependent variable** and the following **independent variable**:  
mean of the total counts of unique STs per program (st\_count\_mean)

Model = adonis(formula = prop ~ st\_count\_mean, data = d18b, permutations = 1000)

|               | Df  | SumsOfSqs        | MeanSqs           | F.Model          | R <sup>2</sup>     | Pr(>F)               |
|---------------|-----|------------------|-------------------|------------------|--------------------|----------------------|
| st_count_mean | 1   | 6.6959987945063  | 6.6959987945063   | 49.2808541894239 | 0.0882725134125825 | 0.000999000999000999 |
| Residuals     | 509 | 69.159990070447  | 0.135874243753334 |                  | 0.911727486587418  |                      |
| Total         | 510 | 75.8559888649533 |                   |                  | 1                  |                      |

**H.**

PERMANOVA model using the proportion of non-classified STs as **dependent variable** and the following **independent variable**:  
mean of the total counts of unique alleles across all genes per program (total\_alleles\_genes\_mean)

Model = adonis(formula = prop ~ total\_alleles\_genes\_mean, data = d18b, permutations = 1000)

|                          | Df  | SumsOfSqs        | MeanSqs           | F.Model          | R <sup>2</sup>     | Pr(>F)               |
|--------------------------|-----|------------------|-------------------|------------------|--------------------|----------------------|
| total_alleles_genes_mean | 1   | 6.69599879450637 | 6.69599879450637  | 49.2808541894246 | 0.0882725134125835 | 0.000999000999000999 |
| Residuals                | 509 | 69.1599900704469 | 0.135874243753334 |                  | 0.911727486587416  |                      |
| Total                    | 510 | 75.8559888649533 |                   |                  | 1                  |                      |

I.

PERMANOVA model using the proportion of non-classified STs as **dependent variable** and the following **independent variable**:  
Simpson's D index of diversity per *S. enterica* serovar (simpson)

Model = adonis(formula = prop ~ simpson, data = d18b, permutations = 1000)

|           | Df  | SumsOfSqs        | MeanSqs           | F.Model          | R <sup>2</sup>     | Pr(>F)               |
|-----------|-----|------------------|-------------------|------------------|--------------------|----------------------|
| simpson   | 1   | 1.1819423928987  | 1.1819423928987   | 8.05646280613147 | 0.0155813985234959 | 0.000999000999000999 |
| Residuals | 509 | 74.6740464720546 | 0.146707360455903 |                  | 0.984418601476504  |                      |
| Total     | 510 | 75.8559888649533 |                   |                  | 1                  |                      |

J.

PPERMANOVA model using the proportion of non-classified STs as **dependent variable** and the following **independent variable**:  
Standard deviation of the number of contigs (num\_contigs\_sd)

Model = adonis(formula = prop ~ num\_contigs\_sd, data = d18c, permutations = 1000)

|                | Df  | SumsOfSqs         | MeanSqs           | F.Model          | R <sup>2</sup>      | Pr(>F)            |
|----------------|-----|-------------------|-------------------|------------------|---------------------|-------------------|
| num_contigs_sd | 1   | 0.320546129525937 | 0.320546129525937 | 2.16001884704885 | 0.00422571947610632 | 0.115884115884116 |
| Residuals      | 509 | 75.5354427354273  | 0.148399691032274 |                  | 0.995774280523894   |                   |
| Total          | 510 | 75.8559888649533  |                   |                  | 1                   |                   |

**K.**

PERMANOVA model using the proportion of non-classified STs as **dependent variable** and the following **independent variable**:  
Standard deviation of the total counts for nucleotides per genomes (total\_nucl\_sd)

Model = adonis(formula = prop ~ total\_nucl\_sd, data = d18c, permutations = 1000)

|               | Df  | SumsOfSqs        | MeanSqs          | F.Model          | R <sup>2</sup>      | Pr(>F)            |
|---------------|-----|------------------|------------------|------------------|---------------------|-------------------|
| total_nucl_sd | 1   | 0.54987638138005 | 0.54987638138005 | 3.71665816879736 | 0.00724895146194715 | 0.043956043956044 |
| Residuals     | 509 | 75.3061124835732 | 0.14794914043924 |                  | 0.992751048538053   |                   |
| Total         | 510 | 75.8559888649533 |                  |                  | 1                   |                   |

**L.**

PermPERMANOVA model using the proportion of non-classified STs as **dependent variable** and the following **independent variable**:  
Standard deviation of the average GC% per genome (gc\_avg\_sd)

Model = adonis(formula = prop ~ gc\_avg\_sd, data = d18c, permutations = 1000)

|           | Df  | SumsOfSqs         | MeanSqs           | F.Model          | R <sup>2</sup>      | Pr(>F)             |
|-----------|-----|-------------------|-------------------|------------------|---------------------|--------------------|
| gc_avg_sd | 1   | 0.332391331936203 | 0.332391331936203 | 2.24018973515612 | 0.00438187329583113 | 0.0929070929070929 |
| Residuals | 509 | 75.5235975330171  | 0.148376419514768 |                  | 0.995618126704169   |                    |
| Total     | 510 | 75.8559888649533  |                   |                  | 1                   |                    |

**Figure S14.** PERMANOVA results measuring the association between *S. enterica* serovars (serovar), program, or genome-intrinsic and –extrinsic variables and the proportion of non-classified STs.

PERMANOVA results demonstrating the association (*R*-squared and *p*-values) between the proportion of non-classified STs (prop) with: (A) bacterial serovar and program (mlst vs. stringMLST with all k-mer lengths); (B) bacterial serovar; (C) program (mlst vs. stringMLST with all k-mer lengths); (D) the median number of

contigs (num\_contigs\_median); (E) the mean total number of nucleotides (total\_nucl\_mean); (F) the mean GC% content originally calculated per genome (gc\_avg\_mean); (G) the mean total count of STs present in each generated database (st\_count\_mean); (H) the mean total count of unique alleles (across all 7 loci) present in each generated database (total\_alleles\_genes\_mean); (I) the Simpson's D index of diversity (simpson); (J) the standard deviation (SD) of the number of contigs (num\_contigs\_sd); (K) the SD of the total number of nucleotides (total\_nucl\_sd); (L) the SD of the GC% content per genome (gc\_avg\_sd). The median number of contigs, mean total number of nucleotides, and mean GC% content were grouped by serovar and batch (experimental replicate). The SD of the number of contigs, SD of the total number of nucleotides, and SD of GC% content were calculated by serovar only. The mean total count of STs and mean total count of unique alleles (across all 7 loci) present in each generated database were calculated after grouping by serovar, batch (three experimental replicates), and program. The Simpson's D index of diversity was calculated after grouping by program, serovar, and batch (three experimental replicates). All PERMANOVA models were run with 1,000 permutations.
