# Supplementary material for: Systems-Based Approach for Optimization of Assembly-Free Bacterial MLST Mapping
Source: MDPI journal article supplement (doi:10.3390/life12050670), 2022-04-30
Supplement: s1 [file s1]

**A.**

PERMANOVA model using ST richness as *dependent variable* and the following *independent variables*:  
bacterial species (species) and program as MLST or stringMLST (program)

Model = adonis(formula = n ~ species \* program, data = d14, permutations = 1000)

|                 | Df  | SumsOfSqs          | MeanSqs              | F.Model           | R <sup>2</sup>      | Pr(>F)               |
|-----------------|-----|--------------------|----------------------|-------------------|---------------------|----------------------|
| species         | 3   | 7.51793789980392   | 2.50597929993464     | 2011.1886976523   | 0.982921621030805   | 0.000999000999000999 |
| program         | 9   | 0.0146871548379872 | 0.00163190609310969  | 1.30969600993022  | 0.00192025023804218 | 0.224775224775225    |
| species:program | 27  | 0.0162563830939995 | 0.000602088262740721 | 0.483209541692874 | 0.00212541665491391 | 0.99000999000999     |
| Residuals       | 80  | 0.099681518809644  | 0.00124601898512055  |                   | 0.0130327120762388  |                      |
| Total           | 119 | 7.64856295654555   |                      |                   | 1                   |                      |

**B.**

PERMANOVA model using ST richness as *dependent variable* and the following *independent variable*:  
bacterial species (species)

Model = adonis(formula = n ~ species, data = d14, permutations = 1000)

|           | Df  | SumsOfSqs         | MeanSqs             | F.Model          | R <sup>2</sup>     | Pr(>F)               |
|-----------|-----|-------------------|---------------------|------------------|--------------------|----------------------|
| species   | 3   | 7.51793789980392  | 2.50597929993464    | 2225.40457431069 | 0.982921621030805  | 0.000999000999000999 |
| Residuals | 116 | 0.130625056741631 | 0.00112607807535889 |                  | 0.0170783789691949 |                      |
| Total     | 119 | 7.64856295654555  |                     |                  | 1                  |                      |

C.

PERMANOVA model using ST richness as *dependent variable* and the following *independent variable*:  
program as MLST or stringMLST (program)

Model = adonis(formula = n ~ program, data = d14, permutations = 1000)

|           | Df  | SumsOfSqs          | MeanSqs             | F.Model            | R <sup>2</sup>      | Pr(>F) |
|-----------|-----|--------------------|---------------------|--------------------|---------------------|--------|
| program   | 9   | 0.0146871548379877 | 0.00163190609310974 | 0.0235148795847475 | 0.00192025023804224 | 1      |
| Residuals | 110 | 7.63387580170756   | 0.0693988709246142  |                    | 0.998079749761958   |        |
| Total     | 119 | 7.64856295654555   |                     |                    | 1                   |        |

D.

PERMANOVA model using ST richness as *dependent variable* and the following *independent variable*:  
median of the number of contigs (num\_contigs\_median)

Model = adonis(formula = n ~ num\_contigs\_median, data = d14, permutations = 1000)

|                    | Df  | SumsOfSqs        | MeanSqs           | F.Model          | R <sup>2</sup>    | Pr(>F)               |
|--------------------|-----|------------------|-------------------|------------------|-------------------|----------------------|
| num_contigs_median | 1   | 1.44641113449941 | 1.44641113449941  | 27.5189190410083 | 0.189108874793478 | 0.000999000999000999 |
| Residuals          | 118 | 6.20215182204614 | 0.052560608661408 |                  | 0.810891125206522 |                      |
| Total              | 119 | 7.64856295654555 |                   |                  | 1                 |                      |

**E.**

PERMANOVA model using ST richness as *dependent variable* and the following *independent variable*:  
mean of the total counts for nucleotides per genomes (total\_nucl\_mean)

Model = adonis(formula = n ~ total\_nucl\_mean, data = d14, permutations = 1000)

|                 | Df  | SumsOfSqs        | MeanSqs            | F.Model         | R <sup>2</sup>    | Pr(>F)               |
|-----------------|-----|------------------|--------------------|-----------------|-------------------|----------------------|
| total_nucl_mean | 1   | 1.3737610065047  | 1.3737610065047    | 25.834090072994 | 0.179610341747798 | 0.000999000999000999 |
| Residuals       | 118 | 6.27480195004085 | 0.0531762877122106 |                 | 0.820389658252202 |                      |
| Total           | 119 | 7.64856295654555 |                    |                 | 1                 |                      |

**F.**

PERMANOVA model using ST richness as *dependent variable* and the following *independent variable*:  
mean of the average GC% per genome (gc\_avg\_mean)

Model = adonis(formula = n ~ gc\_avg\_mean, data = d14, permutations = 1000)

|             | Df  | SumsOfSqs        | MeanSqs            | F.Model          | R <sup>2</sup>    | Pr(>F)               |
|-------------|-----|------------------|--------------------|------------------|-------------------|----------------------|
| gc_avg_mean | 1   | 3.35589095505983 | 3.35589095505983   | 92.2491009236216 | 0.438760976947689 | 0.000999000999000999 |
| Residuals   | 118 | 4.29267200148572 | 0.0363785762837772 |                  | 0.56123902305231  |                      |
| Total       | 119 | 7.64856295654555 |                    |                  | 1                 |                      |

**G.**

PERMANOVA model using ST richness as *dependent variable* and the following *independent variable*:  
mean of the total counts of unique STs per program (st\_count\_mean)

Model = adonis(formula = n ~ st\_count\_mean, data = d14, permutations = 1000)

|               | Df  | SumsOfSqs         | MeanSqs            | F.Model          | R <sup>2</sup>     | Pr(>F)            |
|---------------|-----|-------------------|--------------------|------------------|--------------------|-------------------|
| st_count_mean | 1   | 0.118289690970522 | 0.118289690970522  | 1.85360916426925 | 0.0154656098985615 | 0.166833166833167 |
| Residuals     | 118 | 7.53027326557503  | 0.0638158751319917 |                  | 0.984534390101439  |                   |
| Total         | 119 | 7.64856295654555  |                    |                  | 1                  |                   |

**H.**

PERMANOVA model using ST richness as *dependent variable* and the following *independent variable*:  
mean of the total counts of unique alleles across all genes per program (total\_alleles\_genes\_mean)

Model = adonis(formula = n ~ total\_alleles\_genes\_mean, data = d14, permutations = 1000)

|                          | Df  | SumsOfSqs        | MeanSqs            | F.Model          | R <sup>2</sup>    | Pr(>F)              |
|--------------------------|-----|------------------|--------------------|------------------|-------------------|---------------------|
| total_alleles_genes_mean | 1   | 1.06185600851364 | 1.06185600851364   | 19.0230125604796 | 0.138830786194277 | 0.00099900099900999 |
| Residuals                | 118 | 6.58670694803191 | 0.0558195504070501 |                  | 0.861169213805723 |                     |
| Total                    | 119 | 7.64856295654555 |                    |                  | 1                 |                     |

I.

PERMANOVA model using ST richness as **dependent variable** and the following **independent variable**:  
Simpson's D index of diversity per species (simpson)

Model = adonis(formula = n ~ simpson, data = d14, permutations = 1000)

|           | Df  | SumsOfSqs        | MeanSqs           | F.Model          | R <sup>2</sup>    | Pr(>F)               |
|-----------|-----|------------------|-------------------|------------------|-------------------|----------------------|
| simpson   | 1   | 6.2561804696614  | 6.2561804696614   | 530.191454125543 | 0.817955020466614 | 0.000999000999000999 |
| Residuals | 118 | 1.39238248688415 | 0.011799851583764 |                  | 0.182044979533386 |                      |
| Total     | 119 | 7.64856295654555 |                   |                  | 1                 |                      |

J.

PERMANOVA model using ST richness as **dependent variable** and the following **independent variable**:  
Standard deviation of the number of contigs (num\_contigs\_sd)

Model = adonis(formula = n ~ num\_contigs\_sd, data = d16, permutations = 1000)

|                | Df  | SumsOfSqs        | MeanSqs            | F.Model          | R <sup>2</sup>    | Pr(>F)               |
|----------------|-----|------------------|--------------------|------------------|-------------------|----------------------|
| num_contigs_sd | 1   | 3.8179928916089  | 3.8179928916089    | 117.612562509622 | 0.499177808079818 | 0.000999000999000999 |
| Residuals      | 118 | 3.83057006493665 | 0.0324624581774292 |                  | 0.500822191920182 |                      |
| Total          | 119 | 7.64856295654555 |                    |                  | 1                 |                      |

**K.**

PERMANOVA model using ST richness as **dependent variable** and the following **independent variable**:  
Standard deviation of the total counts for nucleotides per genomes (total\_nucl\_sd)

Model = adonis(formula = n ~ total\_nucl\_sd, data = d16, permutations = 1000)

|               | Df  | SumsOfSqs        | MeanSqs            | F.Model          | R <sup>2</sup>    | Pr(>F)               |
|---------------|-----|------------------|--------------------|------------------|-------------------|----------------------|
| total_nucl_sd | 1   | 2.05375408880878 | 2.05375408880878   | 43.3156857023196 | 0.268515027002713 | 0.000999000999000999 |
| Residuals     | 118 | 5.59480886773677 | 0.0474136344723455 |                  | 0.731484972997287 |                      |
| Total         | 119 | 7.64856295654555 |                    |                  | 1                 |                      |

**L.**

PERMANOVA model using ST richness as **dependent variable** and the following **independent variable**:  
Standard deviation of the average GC% per genome (gc\_avg\_sd)

Model = adonis(formula = n ~ gc\_avg\_sd, data = d16, permutations = 1000)

|           | Df  | SumsOfSqs        | MeanSqs            | F.Model          | R <sup>2</sup>   | Pr(>F)               |
|-----------|-----|------------------|--------------------|------------------|------------------|----------------------|
| gc_avg_sd | 1   | 1.58113983642368 | 1.58113983642368   | 30.7502043296177 | 0.20672377875514 | 0.000999000999000999 |
| Residuals | 118 | 6.06742312012187 | 0.0514188400010328 |                  | 0.79327622124486 |                      |
| Total     | 119 | 7.64856295654555 |                    |                  | 1                |                      |

**Figure S7.** PERMANOVA results measuring the association between species, program, or other genome-intrinsic and –extrinsic variables and ST richness. PERMANOVA results demonstrating the association (*R*-squared and *p*-values) between ST richness (n) and: (A) bacterial species and program (mlst vs.

stringMLST with all k-mer lengths); (B) bacterial species; (C) program (mlst vs. stringMLST with all k-mer lengths); (D) the median number of contigs (num\_contigs\_median); (E) the mean total number of nucleotides (total\_nucl\_mean); (F) the mean GC% content originally calculated per genome (gc\_avg\_mean); (G) the mean total count of STs present in each generated database (st\_count\_mean); (H) the mean total count of unique alleles (across all 7 loci) present in each generated database (total\_alleles\_genes\_mean); (I) the Simpson's D index of diversity (simpson); (J) the standard deviation (SD) of the number of contigs (num\_contigs\_sd); (K) the SD of the total number of nucleotides (total\_nucl\_sd); (L) the SD of the GC% content per genome (gc\_avg\_sd). The median number of contigs, mean total number of nucleotides, and mean GC% content were grouped by species and batch (experimental replicate). The SD of the number of contigs, SD of the total number of nucleotides, and SD of GC% content were calculated by species only. The mean total count of STs and mean total count of unique alleles (across all 7 loci) present in each generated database were calculated after grouping by species, batch (three experimental replicates), and program. The Simpson's D index of diversity was calculated after grouping by program, species, and batch (three experimental replicates). All PERMANOVA models were run with 1,000 permutations.
