# Supplementary material for: Systems-Based Approach for Optimization of Assembly-Free Bacterial MLST Mapping
Source: MDPI journal article supplement (doi:10.3390/life12050670), 2022-04-30
Supplement: s1 [file s1]

**A.**

PERMANOVA model using the Simpson's D index of diversity as **dependent variable** and the following **independent variables**:  
bacterial species (species) and program as MLST or stringMLST (program)

Model = adonis(formula = simpson ~ species \* program, data = d13, permutations = 1000)

|                 | Df  | SumsOfSqs            | MeanSqs              | F.Model            | R <sup>2</sup>       | Pr(>F)               |
|-----------------|-----|----------------------|----------------------|--------------------|----------------------|----------------------|
| species         | 3   | 0.410477977217033    | 0.136825992405678    | 2872.17128004194   | 0.990689005884547    | 0.000999000999000999 |
| program         | 9   | 1.11486912828251E-05 | 1.23874347586946E-06 | 0.0260029792013696 | 2.690737748899E-05   | 1                    |
| species:program | 27  | 3.56483293753596E-05 | 1.32030849538369E-06 | 0.0277151444295248 | 8.60372783693751E-05 | 1                    |
| Residuals       | 80  | 0.00381108169575958  | 4.76385211969947E-05 |                    | 0.00919804945959517  |                      |
| Total           | 119 | 0.41433585593345     |                      |                    | 1                    |                      |

**B.**

PERMANOVA model using the Simpson's D index of diversity as **dependent variable** and the following **independent variable**:  
bacterial species (species)

Model = adonis(formula = simpson ~ species, data = d13, permutations = 1000)

|           | Df  | SumsOfSqs           | MeanSqs              | F.Model          | R <sup>2</sup>     | Pr(>F)               |
|-----------|-----|---------------------|----------------------|------------------|--------------------|----------------------|
| species   | 3   | 0.410477977217033   | 0.136825992405678    | 4114.13014398661 | 0.990689005884547  | 0.000999000999000999 |
| Residuals | 116 | 0.00385787871641774 | 3.32575751415323E-05 |                  | 0.0093109941154535 |                      |
| Total     | 119 | 0.41433585593345    |                      |                  | 1                  |                      |

C.

PERMANOVA model using the Simpson's D index of diversity as **dependent variable** and the following **independent variable**:  
program as MLST or stringMLST (program)

Model = adonis(formula = simpson ~ program, data = d13, permutations = 1000)

|           | Df  | SumsOfSqs            | MeanSqs              | F.Model              | R <sup>2</sup>       | Pr(>F) |
|-----------|-----|----------------------|----------------------|----------------------|----------------------|--------|
| program   | 9   | 1.11486912828301E-05 | 1.23874347587002E-06 | 0.000328876796299909 | 2.69073774890021E-05 | 1      |
| Residuals | 110 | 0.414324707242168    | 0.00376658824765607  |                      | 0.999973092622511    |        |
| Total     | 119 | 0.41433585593345     |                      |                      | 1                    |        |

D.

PERMANOVA model using the Simpson's D index of diversity as **dependent variable** and the following **independent variable**:  
median of the number of contigs (num\_contigs\_median)

Model = adonis(formula = simpson ~ num\_contigs\_median, data = d13, permutations = 1000)

|                    | Df  | SumsOfSqs         | MeanSqs             | F.Model         | R <sup>2</sup>    | Pr(>F)               |
|--------------------|-----|-------------------|---------------------|-----------------|-------------------|----------------------|
| num_contigs_median | 1   | 0.163614770286817 | 0.163614770286817   | 77.004065470006 | 0.394884410662967 | 0.000999000999000999 |
| Residuals          | 118 | 0.250721085646634 | 0.00212475496310707 |                 | 0.605115589337033 |                      |
| Total              | 119 | 0.41433585593345  |                     |                 | 1                 |                      |

**E.**

PERMANOVA model using the Simpson's D index of diversity as **dependent variable** and the following **independent variable**:  
mean of the total counts for nucleotides per genomes (total\_nucl\_mean)

Model = adonis(formula = simpson ~ total\_nucl\_mean, data = d13, permutations = 1000)

|                 | Df  | SumsOfSqs           | MeanSqs             | F.Model          | R <sup>2</sup>      | Pr(>F)            |
|-----------------|-----|---------------------|---------------------|------------------|---------------------|-------------------|
| total_nucl_mean | 1   | 0.00373280185890127 | 0.00373280185890127 | 1.07274072849536 | 0.00900912099555493 | 0.310689310689311 |
| Residuals       | 118 | 0.410603054074549   | 0.00347968689893686 |                  | 0.990990879004445   |                   |
| Total           | 119 | 0.41433585593345    |                     |                  | 1                   |                   |

**F.**

PERMANOVA model using the Simpson's D index of diversity as **dependent variable** and the following **independent variable**:  
mean of the average GC% per genome (gc\_avg\_mean)

Model = adonis(formula = simpson ~ gc\_avg\_mean, data = d13, permutations = 1000)

|             | Df  | SumsOfSqs          | MeanSqs             | F.Model          | R <sup>2</sup>    | Pr(>F)               |
|-------------|-----|--------------------|---------------------|------------------|-------------------|----------------------|
| gc_avg_mean | 1   | 0.0717695925601677 | 0.0717695925601677  | 24.7216752715419 | 0.173215982957785 | 0.000999000999000999 |
| Residuals   | 118 | 0.342566263373283  | 0.00290310392689223 |                  | 0.826784017042215 |                      |
| Total       | 119 | 0.41433585593345   |                     |                  | 1                 |                      |

**G.**

PERMANOVA model using the Simpson's D index of diversity as **dependent variable** and the following **independent variable**:  
mean of the total counts of unique STs per program (st\_count\_mean)

Model = adonis(formula = simpson ~ st\_count\_mean, data = d13, permutations = 1000)

|               | Df  | SumsOfSqs           | MeanSqs             | F.Model          | R <sup>2</sup>     | Pr(>F)            |
|---------------|-----|---------------------|---------------------|------------------|--------------------|-------------------|
| st_count_mean | 1   | 0.00642494016874258 | 0.00642494016874258 | 1.85859929364807 | 0.0155065994813988 | 0.163836163836164 |
| Residuals     | 118 | 0.407910915764708   | 0.00345687216749752 |                  | 0.984493400518601  |                   |
| Total         | 119 | 0.41433585593345    |                     |                  | 1                  |                   |

**H.**

PERMANOVA model using the Simpson's D index of diversity as **dependent variable** and the following **independent variable**:  
mean of the total counts of unique alleles across all genes per program (total\_alleles\_genes\_mean)

Model = adonis(formula = simpson ~ total\_alleles\_genes\_mean, data = d13, permutations = 1000)

|                          | Df  | SumsOfSqs            | MeanSqs              | F.Model            | R <sup>2</sup>       | Pr(>F)            |
|--------------------------|-----|----------------------|----------------------|--------------------|----------------------|-------------------|
| total_alleles_genes_mean | 1   | 6.56768036007165E-05 | 6.56768036007165E-05 | 0.0187072669366709 | 0.000158511030750053 | 0.879120879120879 |
| Residuals                | 118 | 0.41427017912985     | 0.00351076422991398  |                    | 0.99984148896925     |                   |
| Total                    | 119 | 0.41433585593345     |                      |                    | 1                    |                   |

I.

PERMANOVA model using the Simpson's D index of diversity as **dependent variable** and the following **independent variable**:  
Standard deviation of the number of contigs (num\_contigs\_sd)

Model = adonis(formula = simpson ~ num\_contigs\_sd, data = d14, permutations = 1000)

|                | Df  | SumsOfSqs         | MeanSqs             | F.Model          | R <sup>2</sup>    | Pr(>F)               |
|----------------|-----|-------------------|---------------------|------------------|-------------------|----------------------|
| num_contigs_sd | 1   | 0.184650012452613 | 0.184650012452613   | 94.8630579020699 | 0.445652988531776 | 0.000999000999000999 |
| Residuals      | 118 | 0.229685843480837 | 0.00194649019899014 |                  | 0.554347011468224 |                      |
| Total          | 119 | 0.41433585593345  |                     |                  | 1                 |                      |

J.

PERMANOVA model using the Simpson's D index of diversity as **dependent variable** and the following **independent variable**:  
Standard deviation of the total counts for nucleotides per genomes (total\_nucl\_sd)

Model = adonis(formula = simpson ~ total\_nucl\_sd, data = d14, permutations = 1000)

|               | Df  | SumsOfSqs         | MeanSqs            | F.Model          | R <sup>2</sup>    | Pr(>F)               |
|---------------|-----|-------------------|--------------------|------------------|-------------------|----------------------|
| total_nucl_sd | 1   | 0.220300024808541 | 0.220300024808541  | 133.972178111131 | 0.531694328776423 | 0.000999000999000999 |
| Residuals     | 118 | 0.19403583112491  | 0.0016443714502111 |                  | 0.468305671223577 |                      |
| Total         | 119 | 0.41433585593345  |                    |                  | 1                 |                      |

**K.**

**PERMANOVA model using the Simpson's D index of diversity as *dependent variable* and the following *independent variable*:  
Standard deviation of the average GC% per genome (gc\_avg\_sd)**

Model = adonis(formula = simpson ~ gc\_avg\_sd, data = d14, permutations = 1000)

|           | Df  | SumsOfSqs          | MeanSqs             | F.Model          | R <sup>2</sup>    | Pr(>F)               |
|-----------|-----|--------------------|---------------------|------------------|-------------------|----------------------|
| gc_avg_sd | 1   | 0.0712010372963118 | 0.0712010372963118  | 24.4851934127079 | 0.171843774263524 | 0.000999000999000999 |
| Residuals | 118 | 0.343134818637139  | 0.00290792219184016 |                  | 0.828156225736476 |                      |
| Total     | 119 | 0.41433585593345   |                     |                  | 1                 |                      |

**Figure S8.** PERMANOVA results measuring the association between species, program, or other genome-intrinsic and –extrinsic variables and the Simpson's D index of diversity.

PERMANOVA results demonstrating the association (*R*-squared and *p*-values) between the Simpson's D index of diversity (simpson) and: (A) bacterial species and program (mlst vs. stringMLST with all k-mer lengths); (B) bacterial species; (C) program (mlst vs. stringMLST with all k-mer lengths); (D) the median number of contigs (num\_contigs\_median); (E) the mean total number of nucleotides (total\_nucl\_mean); (F) the mean GC% content originally calculated per genome (gc\_avg\_mean); (G) the mean total count of STs present in each generated database (st\_count\_mean); (H) the mean total count of unique alleles (across all 7 loci) present in each generated database (total\_alleles\_genes\_mean); (I) the standard deviation (SD) of the number of contigs (num\_contigs\_sd); (J) the SD of the total number of nucleotides (total\_nucl\_sd); (K) the SD of the GC% content per genome (gc\_avg\_sd). The median number of contigs, mean total number of nucleotides, and mean GC% content were grouped by species and batch (experimental replicate). The SD of the number of contigs, SD of the total number of nucleotides, and SD of GC% content were calculated by species only. The mean total count of STs and mean total count of unique alleles (across all 7 loci) present in each generated database were calculated after grouping by species, batch (three experimental replicates), and program. The Simpson's D index of diversity was calculated after grouping by program, species, and batch (three experimental replicates). All PERMANOVA models were run with 1,000 permutations.
