# Supplementary material for: Systems-Based Approach for Optimization of Assembly-Free Bacterial MLST Mapping
Source: MDPI journal article supplement (doi:10.3390/life12050670), 2022-04-30
Supplement: s1 [file s1]

| <i>L. monocytogenes</i> |                            |                            | <i>C. jejuni</i> |                            |                            | <i>S. enterica</i> |                            |                            | <i>S. aureus</i> |                            |                            |
|-------------------------|----------------------------|----------------------------|------------------|----------------------------|----------------------------|--------------------|----------------------------|----------------------------|------------------|----------------------------|----------------------------|
| gene/locus name         | number of genes/loci       |                            | gene/locus name  | number of genes/loci       |                            | gene/locus name    | number of genes/loci       |                            | gene/locus name  | number of genes/loci       |                            |
|                         | string MLST                | mlst                       |                  | string MLST                | mlst                       |                    | string MLST                | mlst                       |                  | string MLST                | mlst                       |
| <b>abcZ</b>             | 423                        | 255                        | <b>aspA</b>      | 527                        | 489                        | <b>aroC</b>        | 1024                       | 813                        | <b>arcC</b>      | 761                        | 621                        |
| <b>bglA</b>             | 373                        | 220                        | <b>glnA</b>      | 712                        | 655                        | <b>dnaN</b>        | 1015                       | 804                        | <b>aroE</b>      | 944                        | 779                        |
| <b>cat</b>              | 402                        | 241                        | <b>gltA</b>      | 608                        | 563                        | <b>hemD</b>        | 949                        | 765                        | <b>glpF</b>      | 845                        | 705                        |
| <b>dapE</b>             | 535                        | 308                        | <b>glyA</b>      | 806                        | 733                        | <b>hisD</b>        | 1428                       | 1132                       | <b>gmk</b>       | 506                        | 399                        |
| <b>dat</b>              | 315                        | 200                        | <b>pgm</b>       | 1082                       | 969                        | <b>purE</b>        | 1115                       | 848                        | <b>pta</b>       | 782                        | 641                        |
| <b>ldh</b>              | 623                        | 461                        | <b>tkt</b>       | 829                        | 761                        | <b>sucA</b>        | 1037                       | 839                        | <b>tpi</b>       | 721                        | 579                        |
| <b>lhkA</b>             | 360                        | 218                        | <b>uncA</b>      | 628                        | 565                        | <b>thrA</b>        | 1206                       | 952                        | <b>yqiL</b>      | 872                        | 694                        |
|                         |                            |                            |                  |                            |                            |                    |                            |                            |                  |                            |                            |
|                         | <b>Total number of STs</b> | <b>Total number of STs</b> |                  | <b>Total number of STs</b> | <b>Total number of STs</b> |                    | <b>Total number of STs</b> | <b>Total number of STs</b> |                  | <b>Total number of STs</b> | <b>Total number of STs</b> |
| <b>ST database</b>      | 2323                       | 1504                       |                  | 11167                      | 9745                       |                    | 6992                       | 5151                       |                  | 6447                       | 5219                       |

**Table S3.** Distribution of counts for each allele across all seven loci per bacterial species and program (mlst vs. stringMLST), including the total count of unique STs present in the ST scheme available in the program.
