# Supplementary material for: Systems-Based Approach for Optimization of Assembly-Free Bacterial MLST Mapping
Source: MDPI journal article supplement (doi:10.3390/life12050670), 2022-04-30
Supplement: s1 [file s1]

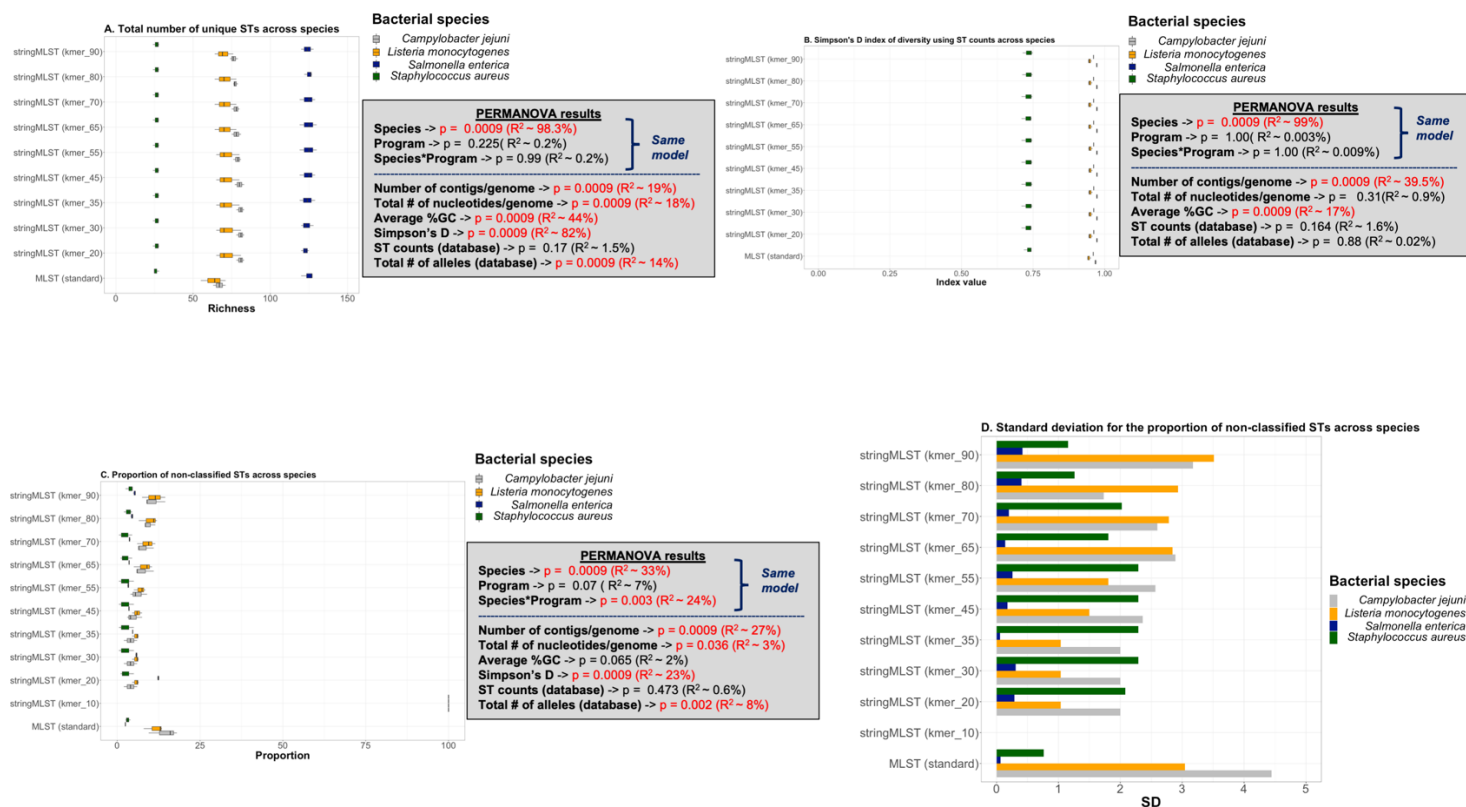

**Figure S6.** Statistical analysis of ST-based classification outcomes for comparison between mlst and stringMLST performance across bacterial species.

(A-C) Box-and-whiskers plots A-C demonstrate the relationship between ST richness (x-axis), Simpson's index of diversity ( $1 - D$ ) based on ST composition (x-axis), or the proportion of non-classified STs (x-axis) across bacterial species (color-coded differently) and programs (y-axis), respectively. Along with plots A-C are depicted all PERMANOVA results including  $p$ -values ( $p < 0.05$ ) and the univariate or synergistic contribution of factors measured by  $R$ -squared. PERMANOVA modeling was done in two specific ways: 1) A model including species, program, and their interaction, considering that those were the main variables of interest; and 2) All other results were calculated using univariate models and included modeling using genome-intrinsic (number of contigs per genome, total number of nucleotides per genome, and average GC% content) and – extrinsic (Simpson's D index of diversity, ST and allelic counts per database) variables. (D) Bar plot depicting the distribution of the standard deviation (SD, y-axis) for the proportion of non-classified STs based on species (color-coded differently) and programs (y-axis).
