# Supplementary material for: Systems-Based Approach for Optimization of Assembly-Free Bacterial MLST Mapping
Source: MDPI journal article supplement (doi:10.3390/life12050670), 2022-04-30
Supplement: s1 [file s1]

| Serovar                          | Number of genomes downloaded from NCBI-SRA |
|----------------------------------|--------------------------------------------|
| <i>Salmonella</i> Agona          | 565                                        |
| <i>Salmonella</i> Anatum         | 600                                        |
| <i>Salmonella</i> Braenderup     | 600                                        |
| <i>Salmonella</i> Derby          | 590                                        |
| <i>Salmonella</i> Dublin         | 600                                        |
| <i>Salmonella</i> Enteritidis    | 600                                        |
| <i>Salmonella</i> Hadar          | 600                                        |
| <i>Salmonella</i> Heidelberg     | 600                                        |
| <i>Salmonella</i> Infantis       | 600                                        |
| <i>Salmonella</i> Javiana        | 600                                        |
| <i>Salmonella</i> Johannesburg   | 534                                        |
| <i>Salmonella</i> Kentucky       | 600                                        |
| <i>Salmonella</i> Mbandaka       | 535                                        |
| <i>Salmonella</i> Montevideo     | 600                                        |
| <i>Salmonella</i> Muenchen       | 600                                        |
| <i>Salmonella</i> Newport        | 600                                        |
| <i>Salmonella</i> Schwarzengrund | 600                                        |
| <i>Salmonella</i> Senftenberg    | 563                                        |
| <i>Salmonella</i> Thompson       | 600                                        |
| <i>Salmonella</i> Typhimurium    | 600                                        |

**Table S1.** Total counts of downloaded genomes per serovar of *S. enterica* Subspecies *enterica* Lineage I. All downloaded genomes were freely available at NCBI-SRA.
