# Supplementary material for: Systems-Based Approach for Optimization of Assembly-Free Bacterial MLST Mapping
Source: MDPI journal article supplement (doi:10.3390/life12050670), 2022-04-30
Supplement: s1 [file s1]

**A.**

PERMANOVA model using ST richness as **dependent variable** and the following **independent variables**:  
***S. enterica* serovars (serovar) and program as MLST or stringMLST (program)**

Model = adonis(formula = n ~ serovar \* program, data = d14, permutations = 1000)

|                 | Df  | SumsOfSqs          | MeanSqs             | F.Model            | R <sup>2</sup>       | Pr(>F)               |
|-----------------|-----|--------------------|---------------------|--------------------|----------------------|----------------------|
| serovar         | 19  | 39.5743056229991   | 2.08285819068416    | 65.7453972769742   | 0.753954496075907    | 0.000999000999000999 |
| program         | 9   | 0.0302818094505213 | 0.00336464549450236 | 0.106205000283566  | 0.000576917422178744 | 1                    |
| serovar:program | 171 | 0.212129026087382  | 0.00124052062039405 | 0.0391570205705148 | 0.00404140086475292  | 1                    |
| Residuals       | 400 | 12.6722677294621   | 0.0316806693236552  |                    | 0.241427185637162    |                      |
| Total           | 599 | 52.4889841879991   |                     |                    | 1                    |                      |

**B.**

PERMANOVA model using ST richness as **dependent variable** and the following **independent variable**:  
***S. enterica* serovars (serovar)**

Model = adonis(formula = n ~ serovar, data = d14, permutations = 1000)

|           | Df  | SumsOfSqs        | MeanSqs            | F.Model          | R <sup>2</sup>    | Pr(>F)               |
|-----------|-----|------------------|--------------------|------------------|-------------------|----------------------|
| serovar   | 19  | 39.5743056229991 | 2.08285819068416   | 93.5414493296616 | 0.753954496075907 | 0.000999000999000999 |
| Residuals | 580 | 12.914678565     | 0.0222666871810345 |                  | 0.246045503924093 |                      |
| Total     | 599 | 52.4889841879991 |                    |                  | 1                 |                      |

C.

PERMANOVA model using ST richness as *dependent variable* and the following *independent variable*:  
program as MLST or stringMLST (program)

Model = adonis(formula = n ~ program, data = d14, permutations = 1000)

|           | Df  | SumsOfSqs          | MeanSqs             | F.Model            | R <sup>2</sup>       | Pr(>F) |
|-----------|-----|--------------------|---------------------|--------------------|----------------------|--------|
| program   | 9   | 0.0302818094505365 | 0.00336464549450406 | 0.0378419738146088 | 0.000576917422179034 | 1      |
| Residuals | 590 | 52.4587023785486   | 0.0889130548788959  |                    | 0.999423082577821    |        |
| Total     | 599 | 52.4889841879991   |                     |                    | 1                    |        |

D.

PERMANOVA model using ST richness as *dependent variable* and the following *independent variable*:  
median of the number of contigs (num\_contigs\_median)

Model = adonis(formula = n ~ num\_contigs\_median, data = d14, permutations = 1000)

|                    | Df  | SumsOfSqs        | MeanSqs            | F.Model         | R <sup>2</sup>      | Pr(>F)            |
|--------------------|-----|------------------|--------------------|-----------------|---------------------|-------------------|
| num_contigs_median | 1   | 0.44768112521022 | 0.44768112521022   | 5.1442469177359 | 0.00852904913546748 | 0.011988011988012 |
| Residuals          | 598 | 52.0413030627889 | 0.0870255904060015 |                 | 0.991470950864533   |                   |
| Total              | 599 | 52.4889841879991 |                    |                 | 1                   |                   |

**E.**

PERMANOVA model using ST richness as *dependent variable* and the following *independent variable*:  
mean of the total counts for nucleotides per genomes (total\_nucl\_mean)

Model = adonis(formula = n ~ total\_nucl\_mean, data = d14, permutations = 1000)

|                 | Df  | SumsOfSqs         | MeanSqs            | F.Model          | R <sup>2</sup>      | Pr(>F)             |
|-----------------|-----|-------------------|--------------------|------------------|---------------------|--------------------|
| total_nucl_mean | 1   | 0.238098824297164 | 0.238098824297164  | 2.72498917364979 | 0.00453616750220138 | 0.0729270729270729 |
| Residuals       | 598 | 52.2508853637019  | 0.0873760624811069 |                  | 0.995463832497799   |                    |
| Total           | 599 | 52.4889841879991  |                    |                  | 1                   |                    |

**F.**

PERMANOVA model using ST richness as *dependent variable* and the following *independent variable*:  
mean of the average GC% per genome (gc\_avg\_mean)

Model = adonis(formula = n ~ gc\_avg\_mean, data = d14, permutations = 1000)

|             | Df  | SumsOfSqs        | MeanSqs           | F.Model          | R <sup>2</sup>     | Pr(>F)               |
|-------------|-----|------------------|-------------------|------------------|--------------------|----------------------|
| gc_avg_mean | 1   | 2.54799906279066 | 2.54799906279066  | 30.5100797617166 | 0.0485435011213881 | 0.000999000999000999 |
| Residuals   | 598 | 49.9409851252084 | 0.083513353052188 |                  | 0.951456498878612  |                      |
| Total       | 599 | 52.4889841879991 |                   |                  | 1                  |                      |

**G.**

PERMANOVA model using ST richness as *dependent variable* and the following *independent variable*:  
mean of the total counts of unique STs per program (st\_count\_mean)

Model = adonis(formula = n ~ st\_count\_mean, data = d14, permutations = 1000)

|               | Df  | SumsOfSqs           | MeanSqs             | F.Model            | R <sup>2</sup>       | Pr(>F)            |
|---------------|-----|---------------------|---------------------|--------------------|----------------------|-------------------|
| st_count_mean | 1   | 0.00089060831664228 | 0.00089060831664228 | 0.0101467539975245 | 1.69675281474757E-05 | 0.996003996003996 |
| Residuals     | 598 | 52.4880935796825    | 0.0877727317385995  |                    | 0.999983032471852    |                   |
| Total         | 599 | 52.4889841879991    |                     |                    | 1                    |                   |

**H.**

PERMANOVA model using ST richness as *dependent variable* and the following *independent variable*:  
mean of the total counts of unique alleles across all genes per program (total\_alleles\_genes\_mean)

Model = adonis(formula = n ~ total\_alleles\_genes\_mean, data = d14, permutations = 1000)

|                          | Df  | SumsOfSqs            | MeanSqs              | F.Model            | R <sup>2</sup>       | Pr(>F)            |
|--------------------------|-----|----------------------|----------------------|--------------------|----------------------|-------------------|
| total_alleles_genes_mean | 1   | 0.000890608316637105 | 0.000890608316637105 | 0.0101467539974656 | 1.69675281473771E-05 | 0.996003996003996 |
| Residuals                | 598 | 52.4880935796825     | 0.0877727317385994   |                    | 0.999983032471853    |                   |
| Total                    | 599 | 52.4889841879991     |                      |                    | 1                    |                   |

I.

PERMANOVA model using ST richness as **dependent variable** and the following **independent variable**:  
Simpson's D index of diversity per *S. enterica* serovar (simpson)

Model = adonis(formula = n ~ simpson, data = d14, permutations = 1000)

|           | Df  | SumsOfSqs        | MeanSqs            | F.Model          | R <sup>2</sup>    | Pr(>F)               |
|-----------|-----|------------------|--------------------|------------------|-------------------|----------------------|
| simpson   | 1   | 24.4898921577139 | 24.4898921577139   | 523.051086602101 | 0.466572034810176 | 0.000999000999000999 |
| Residuals | 598 | 27.9990920302852 | 0.0468212241309117 |                  | 0.533427965189824 |                      |
| Total     | 599 | 52.4889841879991 |                    |                  | 1                 |                      |

J.

PERMANOVA model using ST richness as **dependent variable** and the following **independent variable**:  
Standard deviation of the number of contigs (num\_contigs\_sd)

Model = adonis(formula = n ~ num\_contigs\_sd, data = d16, permutations = 1000)

|                | Df  | SumsOfSqs        | MeanSqs            | F.Model          | R <sup>2</sup>     | Pr(>F)               |
|----------------|-----|------------------|--------------------|------------------|--------------------|----------------------|
| num_contigs_sd | 1   | 2.36289028502892 | 2.36289028502892   | 28.1890783906377 | 0.0450168796668989 | 0.000999000999000999 |
| Residuals      | 598 | 50.1260939029702 | 0.0838228995032946 |                  | 0.954983120333101  |                      |
| Total          | 599 | 52.4889841879991 |                    |                  | 1                  |                      |

**K.**

PERMANOVA model using ST richness as **dependent variable** and the following **independent variable**:  
Standard deviation of the total counts for nucleotides per genomes (total\_nucl\_sd)

Model = adonis(formula = n ~ total\_nucl\_sd, data = d16, permutations = 1000)

|               | Df  | SumsOfSqs        | MeanSqs            | F.Model          | R <sup>2</sup>     | Pr(>F)               |
|---------------|-----|------------------|--------------------|------------------|--------------------|----------------------|
| total_nucl_sd | 1   | 1.704263803706   | 1.704263803706     | 20.0680391051517 | 0.0324689804931615 | 0.000999000999000999 |
| Residuals     | 598 | 50.7847203842931 | 0.0849242815790854 |                  | 0.967531019506839  |                      |
| Total         | 599 | 52.4889841879991 |                    |                  | 1                  |                      |

**L.**

PERMANOVA model using ST richness as **dependent variable** and the following **independent variable**:  
Standard deviation of the average GC% per genome (gc\_avg\_sd)

Model = adonis(formula = n ~ gc\_avg\_sd, data = d16, permutations = 1000)

|           | Df  | SumsOfSqs         | MeanSqs            | F.Model          | R <sup>2</sup>     | Pr(>F)            |
|-----------|-----|-------------------|--------------------|------------------|--------------------|-------------------|
| gc_avg_sd | 1   | 0.884904844087155 | 0.884904844087155  | 10.2544818838348 | 0.0168588677753355 | 0.002997002997003 |
| Residuals | 598 | 51.6040793439119  | 0.0862944470633979 |                  | 0.983141132224664  |                   |
| Total     | 599 | 52.4889841879991  |                    |                  | 1                  |                   |

**Figure S12.** PERMANOVA results measuring the association between *S. enterica* serovars (serovar), program, or genome-intrinsic and –extrinsic variables and ST richness.

PERMANOVA results demonstrating the association (*R*-squared and *p*-values) between ST richness (n) and: (A) serovar and program (mlst vs. stringMLST with all k-mer lengths); (B) serovar; (C) program (mlst vs. stringMLST with all k-mer

lengths); (D) the median number of contigs (num\_contigs\_median); (E) the mean total number of nucleotides (total\_nucl\_mean); (F) the mean GC% content originally calculated per genome (gc\_avg\_mean); (G) the mean total count of STs present in each generated database (st\_count\_mean); (H) the mean total count of unique alleles (across all 7 loci) present in each generated database (total\_alleles\_genes\_mean); (I) the Simpson's D index of diversity (simpson); (J) the standard deviation (SD) of the number of contigs (num\_contigs\_sd); (K) the SD of the total number of nucleotides (total\_nucl\_sd); (L) the SD of the GC% content per genome (gc\_avg\_sd). The median number of contigs, mean total number of nucleotides, and mean GC% content were grouped by serovar and batch (experimental replicate). The SD of the number of contigs, SD of the total number of nucleotides, and SD of GC% content were calculated by serovar only. The mean total count of STs and mean total count of unique alleles (across all 7 loci) present in each generated database were calculated after grouping by serovar, batch (three experimental replicates), and program. The Simpson's D index of diversity was calculated after grouping by program, serovar, and batch (three experimental replicates). All PERMANOVA models were run with 1,000 permutations.
