# Supplementary material for: Systems-Based Approach for Optimization of Assembly-Free Bacterial MLST Mapping
Source: MDPI journal article supplement (doi:10.3390/life12050670), 2022-04-30
Supplement: s1 [file s1]

**A.**

PERMANOVA model using the Simpson's D index of diversity as **dependent variable** and the following **independent variables**:  
*S. enterica* serovars (serovar) and program as MLST or stringMLST (program)

Model = adonis(formula = simpson ~ serovar \* program, data = d14, permutations = 1000)

|                 | Df  | SumsOfSqs         | MeanSqs            | F.Model           | R <sup>2</sup>      | Pr(>F)               |
|-----------------|-----|-------------------|--------------------|-------------------|---------------------|----------------------|
| serovar         | 17  | 85.7297109948326  | 5.04292417616662   | 194.682446036456  | 0.880851447565824   | 0.000999000999000999 |
| program         | 9   | 0.192616168185751 | 0.0214017964650834 | 0.826217872774765 | 0.00197908319767026 | 0.659340659340659    |
| serovar:program | 153 | 2.07843106001404  | 0.0135845167321179 | 0.524431233396458 | 0.0213553619466825  | 1                    |
| Residuals       | 360 | 9.32519978241913  | 0.025903332728942  |                   | 0.0958141072898229  |                      |
| Total           | 539 | 97.3259580054515  |                    |                   | 1                   |                      |

**B.**

PERMANOVA model using the Simpson's D index of diversity as **dependent variable** and the following **independent variable**:  
*S. enterica* serovars (serovar)

Model = adonis(formula = simpson ~ serovar, data = d14, permutations = 1000)

|           | Df  | SumsOfSqs        | MeanSqs            | F.Model          | R <sup>2</sup>    | Pr(>F)               |
|-----------|-----|------------------|--------------------|------------------|-------------------|----------------------|
| serovar   | 17  | 85.7297109948326 | 5.04292417616662   | 227.005031675199 | 0.880851447565824 | 0.000999000999000999 |
| Residuals | 522 | 11.5962470106189 | 0.0222150325873926 |                  | 0.119148552434176 |                      |
| Total     | 539 | 97.3259580054515 |                    |                  | 1                 |                      |

**C.**

PERMANOVA model using the Simpson's D index of diversity as **dependent variable** and the following **independent variable**:  
program as MLST or stringMLST (program)

Model = adonis(formula = simpson ~ program, data = d14, permutations = 1000)

|           | Df  | SumsOfSqs         | MeanSqs            | F.Model           | R <sup>2</sup>      | Pr(>F) |
|-----------|-----|-------------------|--------------------|-------------------|---------------------|--------|
| program   | 9   | 0.192616168185761 | 0.0214017964650846 | 0.116777122169836 | 0.00197908319767037 | 1      |
| Residuals | 530 | 97.1333418372657  | 0.183270456296728  |                   | 0.99802091680233    |        |
| Total     | 539 | 97.3259580054515  |                    |                   | 1                   |        |

**D.**

PERMANOVA model using the Simpson's D index of diversity as **dependent variable** and the following **independent variable**:  
median of the number of contigs (num\_contigs\_median)

Model = adonis(formula = simpson ~ num\_contigs\_median, data = d14, permutations = 1000)

|                    | Df  | SumsOfSqs        | MeanSqs           | F.Model          | R <sup>2</sup>     | Pr(>F)            |
|--------------------|-----|------------------|-------------------|------------------|--------------------|-------------------|
| num_contigs_median | 1   | 1.06238403124153 | 1.06238403124153  | 5.93747546669179 | 0.0109157315582963 | 0.003996003996004 |
| Residuals          | 538 | 96.26357397421   | 0.178928576160242 |                  | 0.989084268441704  |                   |
| Total              | 539 | 97.3259580054515 |                   |                  | 1                  |                   |

**E.**

PERMANOVA model using the Simpson's D index of diversity as **dependent variable** and the following **independent variable**:  
mean of the total counts for nucleotides per genomes (total\_nucl\_mean)

Model = adonis(formula = simpson ~ total\_nucl\_mean, data = d14, permutations = 1000)

|                 | Df  | SumsOfSqs        | MeanSqs           | F.Model          | R <sup>2</sup>      | Pr(>F)           |
|-----------------|-----|------------------|-------------------|------------------|---------------------|------------------|
| total_nucl_mean | 1   | 0.70701945670127 | 0.70701945670127  | 3.93687276447733 | 0.00726444898350415 | 0.01998001998002 |
| Residuals       | 538 | 96.6189385487502 | 0.179589105109201 |                  | 0.992735551016496   |                  |
| Total           | 539 | 97.3259580054515 |                   |                  | 1                   |                  |

**F.**

PERMANOVA model using the Simpson's D index of diversity as **dependent variable** and the following **independent variable**:  
mean of the average GC% per genome (gc\_avg\_mean)

Model = adonis(formula = simpson ~ gc\_avg\_mean, data = d14, permutations = 1000)

|             | Df  | SumsOfSqs        | MeanSqs           | F.Model          | R <sup>2</sup>     | Pr(>F)               |
|-------------|-----|------------------|-------------------|------------------|--------------------|----------------------|
| gc_avg_mean | 1   | 7.47341510145232 | 7.47341510145232  | 44.7477299432379 | 0.0767874804893646 | 0.000999000999000999 |
| Residuals   | 538 | 89.8525429039992 | 0.167012161531597 |                  | 0.923212519510635  |                      |
| Total       | 539 | 97.3259580054515 |                   |                  | 1                  |                      |

**G.**

PERMANOVA model using the Simpson's D index of diversity as **dependent variable** and the following **independent variable**:  
mean of the total counts of unique STs per program (st\_count\_mean)

Model = adonis(formula = simpson ~ st\_count\_mean, data = d14, permutations = 1000)

|               | Df  | SumsOfSqs         | MeanSqs           | F.Model           | R <sup>2</sup>      | Pr(>F)            |
|---------------|-----|-------------------|-------------------|-------------------|---------------------|-------------------|
| st_count_mean | 1   | 0.110218487813067 | 0.110218487813067 | 0.609958292120707 | 0.00113246753560745 | 0.533466533466533 |
| Residuals     | 538 | 97.2157395176384  | 0.180698400590406 |                   | 0.998867532464393   |                   |
| Total         | 539 | 97.3259580054515  |                   |                   | 1                   |                   |

**H.**

PERMANOVA model using the Simpson's D index of diversity as **dependent variable** and the following **independent variable**:  
mean of the total counts of unique alleles across all genes per program (total\_alleles\_genes\_mean)

Model = adonis(formula = simpson ~ total\_alleles\_genes\_mean, data = d14, permutations = 1000)

|                          | Df  | SumsOfSqs         | MeanSqs           | F.Model           | R <sup>2</sup>      | Pr(>F)            |
|--------------------------|-----|-------------------|-------------------|-------------------|---------------------|-------------------|
| total_alleles_genes_mean | 1   | 0.110218487813107 | 0.110218487813107 | 0.609958292120928 | 0.00113246753560786 | 0.533466533466533 |
| Residuals                | 538 | 97.2157395176384  | 0.180698400590406 |                   | 0.998867532464392   |                   |
| Total                    | 539 | 97.3259580054515  |                   |                   | 1                   |                   |

I.

PERMANOVA model using the Simpson's D index of diversity as **dependent variable** and the following **independent variable**:  
Standard deviation of the number of contigs (num\_contigs\_sd)

Model = adonis(formula = simpson ~ num\_contigs\_sd, data = d16, permutations = 1000)

|                | Df  | SumsOfSqs        | MeanSqs           | F.Model          | R <sup>2</sup>    | Pr(>F)               |
|----------------|-----|------------------|-------------------|------------------|-------------------|----------------------|
| num_contigs_sd | 1   | 18.1227489554589 | 18.1227489554589  | 123.101564380841 | 0.186206735868388 | 0.000999000999000999 |
| Residuals      | 538 | 79.2032090499926 | 0.147217860687719 |                  | 0.813793264131612 |                      |
| Total          | 539 | 97.3259580054515 |                   |                  | 1                 |                      |

J.

PERMANOVA model using the Simpson's D index of diversity as **dependent variable** and the following **independent variable**:  
Standard deviation of the total counts for nucleotides per genomes (total\_nucl\_sd)

Model = adonis(formula = simpson ~ total\_nucl\_sd, data = d16, permutations = 1000)

|               | Df  | SumsOfSqs        | MeanSqs           | F.Model          | R <sup>2</sup>    | Pr(>F)               |
|---------------|-----|------------------|-------------------|------------------|-------------------|----------------------|
| total_nucl_sd | 1   | 12.5127094628339 | 12.5127094628339  | 79.3724778460993 | 0.128564976078972 | 0.000999000999000999 |
| Residuals     | 538 | 84.8132485426176 | 0.157645443387765 |                  | 0.871435023921028 |                      |
| Total         | 539 | 97.3259580054515 |                   |                  | 1                 |                      |

**K.**

**PERMANOVA model using the Simpson's D index of diversity as *dependent variable* and the following *independent variable*:  
Standard deviation of the average GC% per genome (gc\_avg\_sd)**

Model = adonis(formula = simpson ~ gc\_avg\_sd, data = d16, permutations = 1000)

|           | Df  | SumsOfSqs        | MeanSqs           | F.Model          | R <sup>2</sup>     | Pr(>F)            |
|-----------|-----|------------------|-------------------|------------------|--------------------|-------------------|
| gc_avg_sd | 1   | 1.35976083775894 | 1.35976083775894  | 7.62301052146506 | 0.0139712042462791 | 0.001998001998002 |
| Residuals | 538 | 95.9661971676926 | 0.178375831166715 |                  | 0.986028795753721  |                   |
| Total     | 539 | 97.3259580054515 |                   |                  | 1                  |                   |

**Figure S13.** PERMANOVA results measuring the association between *S. enterica* serovars (serovar), program, or genome-intrinsic and –extrinsic variables and the Simpson's D index of diversity.

PERMANOVA results demonstrating the association (*R*-squared and *p*-values) between the Simpson's D index of diversity (simpson) and: (A) bacterial serovar and program (mlst vs. stringMLST with all k-mer lengths); (B) bacterial serovar; (C) program (mlst vs. stringMLST with all k-mer lengths); (D) the median number of contigs (num\_contigs\_median); (E) the mean total number of nucleotides (total\_nucl\_mean); (F) the mean GC% content originally calculated per genome (gc\_avg\_mean); (G) the mean total count of STs present in each generated database (st\_count\_mean); (H) the mean total count of unique alleles (across all 7 loci) present in each generated database (total\_alleles\_genes\_mean); (I) the standard deviation (SD) of the number of contigs (num\_contigs\_sd); (J) the SD of the total number of nucleotides (total\_nucl\_sd); (K) the SD of the GC% content per genome (gc\_avg\_sd). The median number of contigs, mean total number of nucleotides, and mean GC% content were grouped by serovar and batch (experimental replicate). The SD of the number of contigs, SD of the total number of nucleotides, and SD of GC% content were calculated by serovar only. The mean total count of STs and mean total count of unique alleles (across all 7 loci) present in each generated database were calculated after grouping by serovar, batch (three experimental replicates), and program. The Simpson's D index of diversity was calculated after grouping by program, serovar, and batch (three experimental replicates). All PERMANOVA models were run with 1,000 permutations.
